# Supplementary material for: Association Between Lifestyle Factors, Vitamin and Garlic Supplementation, and Gastric Cancer Outcomes: A Secondary Analysis of a Randomized Clinical Trial
Source: PubMed Central journal article supplement (PMC7320300; doi:10.1001/jamanetworkopen.2020.6628), 2020-06-26
Supplement: jamanetwopen-3-e206628-s001.pdf [file jamanetwopen-3-e206628-s001.pdf]

## Supplementary Online Content

Guo Y, Li Z-X, Zhang J-Y, et al. Association between lifestyle factors, vitamin and garlic supplementation, and gastric cancer outcomes: a secondary analysis of a randomized clinical trial. *JAMA Netw Open*. 2020;3(6):e206628.  
doi:10.1001/jamanetworkopen.2020.6628

**eTable 1.** Assessment of Missing Data

**eTable 2.** Effects of Vitamin Supplementation on Gastric Lesion Progression Stratified by Lifestyle Factors

**eTable 3.** Effects of Vitamin Supplementation on the Progression of Gastric Lesions, Stratified by Consumption of Vegetables and Fruit Among Participants With and Without *H pylori* Infection

**eTable 4.** Statistical Power for Association and Subgroup Analyses

This supplementary material has been provided by the authors to give readers additional information about their work.

**eTable 1. Assessment of Missing Data<sup>a</sup>**

|                         | Analyses of smoking and alcohol drinking                  |                                      |          | Analyses of dietary factors                               |                                      |          |
|-------------------------|-----------------------------------------------------------|--------------------------------------|----------|-----------------------------------------------------------|--------------------------------------|----------|
|                         | Subjects remaining in the analyses <sup>b</sup><br>n=3237 | Overall trial participants<br>n=3365 | <i>P</i> | Subjects remaining in the analyses <sup>b</sup><br>n=3168 | Overall trial participants<br>n=3365 | <i>P</i> |
| Age                     | 46.9 ± 9.1                                                | 47.1 ± 9.2                           | .46      | 46.9 ± 9.1                                                | 47.1 ± 9.2                           | .34      |
| Sex                     |                                                           |                                      | .61      |                                                           |                                      | .65      |
| Male                    | 1640 (50.7%)                                              | 1726 (51.3%)                         |          | 1607 (50.7%)                                              | 1726 (51.3%)                         |          |
| Female                  | 1597 (49.3%)                                              | 1639 (48.7%)                         |          | 1561 (49.3%)                                              | 1639 (48.7%)                         |          |
| Gastric lesions         |                                                           |                                      | .82      |                                                           |                                      | .68      |
| Normal/SG/CAG           | 1556 (48.1%)                                              | 1598 (47.8%)                         |          | 1530 (48.3%)                                              | 1598 (47.8%)                         |          |
| IM/DYS                  | 1681 (51.9%)                                              | 1746 (52.2%)                         |          | 1638 (51.7%)                                              | 1746 (52.2%)                         |          |
| Vitamin supplementation |                                                           |                                      | .94      |                                                           |                                      | .98      |
| Active                  | 1610 (49.7%)                                              | 1677 (49.8%)                         |          | 1578 (49.8%)                                              | 1677 (49.8%)                         |          |
| Placebo                 | 1627 (50.3%)                                              | 1688 (50.2%)                         |          | 1590 (50.2%)                                              | 1688 (50.2%)                         |          |
| Garlic supplementation  |                                                           |                                      | .84      |                                                           |                                      | .96      |
| Active                  | 1606 (49.6%)                                              | 1678 (49.9%)                         |          | 1578 (49.8%)                                              | 1678 (49.9%)                         |          |
| Placebo                 | 1631 (50.4%)                                              | 1687 (50.1%)                         |          | 1590 (50.2%)                                              | 1687 (50.1%)                         |          |
| GC incidence            |                                                           |                                      | .92      |                                                           |                                      | .96      |
| Yes                     | 147 (4.5%)                                                | 151 (4.5%)                           |          | 143 (4.5%)                                                | 151 (4.5%)                           |          |
| No                      | 3090 (95.5%)                                              | 3214 (95.5%)                         |          | 3025 (95.5%)                                              | 3214 (95.5%)                         |          |
| GC mortality            |                                                           |                                      | .97      |                                                           |                                      | .97      |
| Yes                     | 90 (2.8%)                                                 | 94 (2.8%)                            |          | 88 (2.8%)                                                 | 94 (2.8%)                            |          |
| No                      | 3147 (97.2%)                                              | 3271 (97.2%)                         |          | 3080 (97.2%)                                              | 3271 (97.2%)                         |          |

<sup>a</sup>Among 3365 trial participants, information on age, sex, and interventions were available for all. We missed information on baseline gastric lesions for 21 participants. Information on smoking and alcohol drinking was missed for the same 112 participants. Information on dietary factors was missed for 80 participants.

<sup>b</sup>Subjects with missing information on the major independent variables or covariates were excluded from the multivariable models.

**eTable 2. Effects of Vitamin Supplementation on Gastric Lesion Progression Stratified by Lifestyle Factors**

|                                                       | Placebo            | Active             | OR (95%CI) <sup>b</sup> | P for interaction <sup>c</sup> |
|-------------------------------------------------------|--------------------|--------------------|-------------------------|--------------------------------|
|                                                       | (n/n) <sup>a</sup> | (n/n) <sup>a</sup> |                         |                                |
| <b>Overall</b>                                        | <b>640/1471</b>    | <b>612/1440</b>    | <b>0.97 (0.83-1.14)</b> |                                |
| Smoking                                               |                    |                    |                         | .34                            |
| Ever                                                  | 295/629            | 292/618            | 1.06 (0.83-1.34)        |                                |
| Never                                                 | 345/842            | 320/822            | 0.91 (0.74-1.12)        |                                |
| Alcohol                                               |                    |                    |                         | .94                            |
| Ever                                                  | 308/660            | 310/682            | 0.97 (0.77-1.23)        |                                |
| Never                                                 | 332/811            | 302/758            | 0.96 (0.78-1.19)        |                                |
| Grain (kg/y) <sup>d</sup>                             |                    |                    |                         | .15                            |
| <225                                                  | 277/611            | 261/631            | 0.83 (0.66-1.06)        |                                |
| ≥225                                                  | 347/826            | 339/782            | 1.08 (0.87-1.33)        |                                |
| Meat (kg/y) <sup>d</sup>                              |                    |                    |                         | .27                            |
| <8                                                    | 304/698            | 282/710            | 0.88 (0.70-1.11)        |                                |
| ≥8                                                    | 320/739            | 318/703            | 1.06 (0.85-1.32)        |                                |
| Total vegetables and fruits (kg/y) <sup>d</sup>       |                    |                    |                         | .08                            |
| <92                                                   | 299/696            | 278/709            | 0.84 (0.67-1.05)        |                                |
| ≥92                                                   | 325/741            | 322/704            | 1.12 (0.90-1.40)        |                                |
| Total fresh vegetables and fruits (kg/y) <sup>d</sup> |                    |                    |                         | .02                            |
| <81                                                   | 305/702            | 276/703            | 0.80 (0.64-1.01)        |                                |
| ≥81                                                   | 319/735            | 324/710            | 1.17 (0.94-1.46)        |                                |

<sup>a</sup>Number of subjects with an event divided by total number of subjects. Those with missing data on the examined independent factor or other covariates were excluded from the multivariable models.

<sup>b</sup>Logistic regression adjusted for baseline histology, age, sex, history of ever using alcohol, and history of ever smoking.

<sup>c</sup>P values for interactions were calculated by adding the interaction term between two items into the regression models, in addition to the indicators of the two items being analyzed.

<sup>d</sup>Levels correspond to median distribution of intake between two groups.

**eTable 3. Effects of Vitamin Supplementation on the Progression of Gastric Lesions, Stratified by Consumption of Vegetables and Fruit Among Participants With and Without *H pylori* Infection**

|                                                       | <i>H. pylori</i> positive     |                              |                         |                                          | <i>H. pylori</i> negative     |                              |                         |                                          |
|-------------------------------------------------------|-------------------------------|------------------------------|-------------------------|------------------------------------------|-------------------------------|------------------------------|-------------------------|------------------------------------------|
|                                                       | Placebo<br>(n/n) <sup>a</sup> | Active<br>(n/n) <sup>a</sup> | OR (95%CI) <sup>b</sup> | <i>P</i> for<br>interaction <sup>c</sup> | Placebo<br>(n/n) <sup>a</sup> | Active<br>(n/n) <sup>a</sup> | OR (95%CI) <sup>b</sup> | <i>P</i> for<br>interaction <sup>c</sup> |
| Total vegetables and fruits (kg/y) <sup>d</sup>       |                               |                              |                         | .94                                      |                               |                              |                         | .003                                     |
| <92                                                   | 211/483                       | 207/475                      | 0.98 (0.75-1.30)        |                                          | 88/213                        | 71/234                       | 0.56 (0.36-0.86)        |                                          |
| ≥92                                                   | 248/490                       | 234/472                      | 1.01 (0.77-1.33)        |                                          | 77/251                        | 88/232                       | 1.42 (0.95-2.13)        |                                          |
| Total fresh vegetables and fruits (kg/y) <sup>d</sup> |                               |                              |                         | .68                                      |                               |                              |                         | .001                                     |
| <81                                                   | 216/488                       | 204/466                      | 0.95 (0.72-1.25)        |                                          | 89/214                        | 72/237                       | 0.53 (0.35-0.82)        |                                          |
| ≥81                                                   | 243/485                       | 237/481                      | 1.03 (0.79-1.36)        |                                          | 76/250                        | 87/229                       | 1.48 (0.98-2.22)        |                                          |

<sup>a</sup>Number of subjects with an event divided by total number of subjects. Those with missing data on the examined independent factor or other covariates were excluded from the multivariable models.

<sup>b</sup>Logistic regression adjusted for baseline histology, age, sex, history of ever using alcohol, and history of ever smoking.

<sup>c</sup>*P* values for interactions were calculated by adding the interaction term between two items into the regression models, in addition to the indicators of the two items being analyzed.

<sup>d</sup>Levels correspond to median distribution of intake between two groups.

**eTable 4. Statistical Power for Association and Subgroup Analyses<sup>a</sup>**

|                                                      | <b>Gastric cancer incidence<sup>b</sup></b> | <b>Gastric cancer mortality<sup>c</sup></b> | <b>Gastric lesion progression<sup>b</sup></b> |
|------------------------------------------------------|---------------------------------------------|---------------------------------------------|-----------------------------------------------|
| <b>Main analyses</b>                                 |                                             |                                             |                                               |
| Smoking                                              | >0.99                                       | >0.99                                       | >0.99                                         |
| Alcohol                                              | >0.99                                       | 0.41                                        | >0.99                                         |
| Grain                                                | 0.19                                        | 0.40                                        | 0.10                                          |
| Meat                                                 | 0.06                                        | >0.99                                       | 0.79                                          |
| Total vegetables and fruit                           | 0.20                                        | 0.13                                        | 0.98                                          |
| Total fresh vegetables and fruit                     | 0.09                                        | 0.52                                        | 0.91                                          |
| <b>Subgroup analyses</b>                             |                                             |                                             |                                               |
| <b>Vitamin supplementation</b>                       |                                             |                                             |                                               |
| Overall                                              | >0.99                                       | >0.99                                       | 0.19                                          |
| Smoking                                              |                                             |                                             |                                               |
| Ever                                                 | 0.98                                        | >0.99                                       | 0.06                                          |
| Never                                                | 0.98                                        | >0.99                                       | 0.42                                          |
| Alcohol                                              |                                             |                                             |                                               |
| Ever                                                 | >0.99                                       | >0.99                                       | 0.14                                          |
| Never                                                | 0.82                                        | >0.99                                       | 0.14                                          |
| Grain (kg/y) <sup>d</sup>                            |                                             |                                             |                                               |
| <225                                                 | 0.87                                        | >0.99                                       | 0.79                                          |
| ≥225                                                 | >0.99                                       | >0.99                                       | 0.20                                          |
| Meat (kg/y) <sup>d</sup>                             |                                             |                                             |                                               |
| <8                                                   | 0.98                                        | >0.99                                       | 0.84                                          |
| ≥8                                                   | 0.99                                        | >0.99                                       | 0.30                                          |
| Total vegetables and fruit (kg/y) <sup>d</sup>       |                                             |                                             |                                               |
| <92                                                  | >0.99                                       | >0.99                                       | 0.82                                          |
| ≥92                                                  | 0.86                                        | >0.99                                       | 0.28                                          |
| Total fresh vegetables and fruit (kg/y) <sup>d</sup> |                                             |                                             |                                               |
| <81                                                  | >0.99                                       | >0.99                                       | 0.88                                          |
| ≥81                                                  | 0.71                                        | >0.99                                       | 0.39                                          |
| <b>Garlic supplementation</b>                        |                                             |                                             |                                               |
| Overall                                              | 0.74                                        | >0.99                                       | 0.10                                          |
| Smoking                                              |                                             |                                             |                                               |
| Ever                                                 | 0.65                                        | >0.99                                       | 0.29                                          |
| Never                                                | 0.20                                        | >0.99                                       | 0.61                                          |
| Alcohol                                              |                                             |                                             |                                               |
| Ever                                                 | 0.05                                        | 0.35                                        | 0.16                                          |
| Never                                                | 0.98                                        | >0.99                                       | 0.43                                          |
| Grain (kg/y) <sup>d</sup>                            |                                             |                                             |                                               |
| <225                                                 | 0.07                                        | >0.99                                       | 0.14                                          |
| ≥225                                                 | 0.93                                        | >0.99                                       | 0.23                                          |

|                                                      |      |       |      |
|------------------------------------------------------|------|-------|------|
| Meat (kg/y) <sup>d</sup>                             |      |       |      |
| <8                                                   | 0.28 | >0.99 | 0.68 |
| ≥8                                                   | 0.45 | >0.99 | 0.42 |
| Total vegetables and fruit (kg/y) <sup>d</sup>       |      |       |      |
| <92                                                  | 0.75 | >0.99 | 0.21 |
| ≥92                                                  | 0.07 | >0.99 | 0.08 |
| Total fresh vegetables and fruit (kg/y) <sup>d</sup> |      |       |      |
| <81                                                  | 0.76 | >0.99 | 0.07 |
| ≥81                                                  | 0.07 | >0.99 | 0.05 |

<sup>a</sup>The power was calculated based on the remaining number of participants in the multivariable models after the exclusion of those missing main independent variable or covariates.

<sup>b</sup>Based on logistic regression and  $\alpha=0.05$ .

<sup>c</sup>Based on cox regression and  $\alpha=0.05$ .

<sup>d</sup>Levels correspond to median distribution of intake between two groups.
