# Supplementary material for: Association Between Lifestyle Factors, Vitamin and Garlic Supplementation, and Gastric Cancer Outcomes: A Secondary Analysis of a Randomized Clinical Trial
Source: PubMed Central journal article supplement (PMC7320300; doi:10.1001/jamanetworkopen.2020.6628), 2020-06-26
Supplement: jamanetwopen-3-e206628-s002.pdf [file jamanetwopen-3-e206628-s002.pdf]

# Data Sharing Statement

Guo. Association Between Lifestyle Factors, Vitamin and Garlic Supplementation, and Gastric Cancer Outcomes. *JAMA Netw Open*. Published June 26, 2020. 10.1001/jamanetworkopen.2020.6628

## Data

**Data available:** Yes

**Data types:** Participant data with identifiers

**How to access data:** Further information on the intervention trial available upon request.

**When available:** With publication

## Supporting Documents

**Document types:** Informed consent form

**How to access documents:** Further information on the intervention trial available upon request.

**When available:** With publication

## Additional Information

**Who can access the data:** Researchers whose proposed use of the data has been approved

**Types of analyses:** For a specified purpose

**Mechanisms of data availability:** After approval of a proposal
